# Supplementary material for: Human Metabolites of Hamaforton™ (Hamamelis virginiana L. Extract) Modulates Fibroblast Extracellular Matrix Components in Response to UV-A Irradiation
Source: PubMed Central journal article supplement (PMC8719534; doi:10.3389/fphar.2021.747638), 2021-12-17
Supplement: Table2.pdf [file Table2.pdf]

| Unigene    | Refseq    | Description | C                                                                                                     | C-HAM   | UV      | UV-HAM  | p value |              |            |             |         |
|------------|-----------|-------------|-------------------------------------------------------------------------------------------------------|---------|---------|---------|---------|--------------|------------|-------------|---------|
|            |           |             |                                                                                                       |         |         |         | UV vs C | UV-HAM vs UV | C-HAM vs C | UV-HAM vs C |         |
| Hs.643357  | NM 006988 | ADAMTS1     | ADAM metalloproteinase with thrombospondin type 1 motif, 1                                            | 0.02808 | 0.02619 | 0.03122 | 0.03004 | 0.03862      | 0.33542    | 0.29007     | 0.20166 |
| Hs.131433  | NM 139025 | ADAMTS13    | ADAM metalloproteinase with thrombospondin type 1 motif, 13                                           | 0.00009 | 0.00009 | 0.00008 | 0.0001  | 0.18186      | 0.12479    | 0.84106     | 0.45432 |
| Hs.271605  | NM 007037 | ADAMTS8     | ADAM metalloproteinase with thrombospondin type 1 motif, 8                                            | 0.00014 | 0.00013 | 0.0001  | 0.00012 | 0.36656      | 0.34148    | 0.79995     | 0.77841 |
| Hs.502328  | NM 000610 | CD44        | CD44 molecule (Indian blood group)                                                                    | 0.18397 | 0.19085 | 0.18611 | 0.19718 | 0.65081      | 0.01842    | 0.29211     | 0.03786 |
| Hs.461086  | NM 004360 | CDH1        | Cadherin 1, type 1, E-cadherin (epithelial)                                                           | 0.00005 | 0.00004 | 0.00004 | 0.00005 | 0.58295      | 0.5875     | 0.52305     | 0.87809 |
| Hs.476092  | NM 003278 | CLEC3B      | C-type lectin domain family 3, member B                                                               | 0.00607 | 0.00673 | 0.00565 | 0.00604 | 0.18696      | 0.15767    | 0.08924     | 0.90005 |
| Hs.143434  | NM 001843 | CTNNA1      | Connexin 1                                                                                            | 0.00012 | 0.00023 | 0.00012 | 0.00013 | 0.06776      | 0.75991    | 0.32363     | 0.91917 |
| Hs.523446  | NM 006239 | COL11A1     | Collagen, type XI, alpha 1                                                                            | 0.00107 | 0.00123 | 0.00075 | 0.00076 | 0.01753      | 0.88251    | 0.26591     | 0.02638 |
| Hs.101302  | NM 004370 | COL12A1     | Collagen, type XII, alpha 1                                                                           | 0.00483 | 0.0054  | 0.00429 | 0.00458 | 0.04795      | 0.10762    | 0.20844     | 0.34308 |
| Hs.409662  | NM 021110 | COL14A1     | Collagen, type XIV, alpha 1                                                                           | 0.00011 | 0.00013 | 0.00007 | 0.00008 | 0.14946      | 0.43698    | 0.6127      | 0.20222 |
| Hs.409034  | NM 001855 | COL15A1     | Collagen, type XV, alpha 1                                                                            | 0.00017 | 0.00021 | 0.00013 | 0.00013 | 0.04842      | 0.96163    | 0.1026      | 0.11608 |
| Hs.368921  | NM 001856 | COL16A1     | Collagen, type XVI, alpha 1                                                                           | 0.00705 | 0.00756 | 0.00638 | 0.00691 | 0.00201      | 0.14917    | 0.14721     | 0.66486 |
| Hs.172928  | NM 000088 | COL1A1      | Collagen, type I, alpha 1                                                                             | 0.92128 | 0.12749 | 0.89105 | 0.93825 | 0.43534      | 0.01807    | 0.0755      | 0.64437 |
| Hs.508716  | NM 001846 | COL4A2      | Collagen, type IV, alpha 2                                                                            | 0.0225  | 0.02322 | 0.02337 | 0.02419 | 0.16221      | 0.38371    | 0.39652     | 0.09453 |
| Hs.210283  | NM 000093 | COL5A1      | Collagen, type V, alpha 1                                                                             | 0.02365 | 0.02675 | 0.01951 | 0.02124 | 0.00145      | 0.02522    | 0.05005     | 0.01397 |
| Hs.474053  | NM 001848 | COL6A1      | Collagen, type VI, alpha 1                                                                            | 0.42813 | 0.46263 | 0.40571 | 0.42306 | 0.05206      | 0.243      | 0.03967     | 0.54529 |
| Hs.420269  | NM 001849 | COL6A2      | Collagen, type VI, alpha 2                                                                            | 0.46721 | 0.50761 | 0.45127 | 0.47042 | 0.25258      | 0.23545    | 0.05708     | 0.86997 |
| Hs.476218  | NM 000094 | COL7A1      | Collagen, type VII, alpha 1                                                                           | 0.00576 | 0.00553 | 0.00505 | 0.00504 | 0.00003      | 0.37097    | 0.57341     | 0.43226 |
| Hs.654548  | NM 001850 | COL8A1      | Collagen, type VIII, alpha 1                                                                          | 0.00354 | 0.0038  | 0.00303 | 0.00325 | 0.01785      | 0.27394    | 0.26688     | 0.05495 |
| Hs.410037  | NM 001901 | CTGF        | Connective tissue growth factor                                                                       | 0.03867 | 0.03783 | 0.0416  | 0.04151 | 0.18996      | 0.91465    | 0.68698     | 0.11659 |
| Hs.656653  | NM 001903 | CTNNA1      | Catenin (cadherin-associated protein), alpha 1, 102kDa                                                | 0.04738 | 0.04859 | 0.04832 | 0.04898 | 0.55064      | 0.48573    | 0.45073     | 0.40857 |
| Hs.712929  | NM 001904 | CTNNA1      | Catenin (cadherin-associated protein), beta 1, 88kDa                                                  | 0.01256 | 0.01276 | 0.01402 | 0.01254 | 0.00602      | 0.07929    | 0.71124     | 0.98449 |
| Hs.166011  | NM 001331 | CTNND1      | Catenin (cadherin-associated protein), delta 1                                                        | 0.01412 | 0.01394 | 0.01413 | 0.01418 | 0.9863       | 0.84587    | 0.7312      | 0.88218 |
| Hs.1314543 | NM 001332 | CTNND2      | Catenin (cadherin-associated protein), delta 2 (neural plakophilin-related arm-repeat protein)        | 0.00009 | 0.00008 | 0.00008 | 0.00005 | 0.06651      | 0.00515    | 0.37969     | 0.00234 |
| Hs.81071   | NM 004425 | ECM1        | Extracellular matrix protein 1                                                                        | 0.01217 | 0.0127  | 0.01177 | 0.01275 | 0.49361      | 0.02156    | 0.27494     | 0.40919 |
| Hs.203717  | NM 02026  | FBN1        | Fibrinogen 1                                                                                          | 3.92858 | 4.2863  | 3.66583 | 3.84101 | 0.95641      | 0.13473    | 0.15145     | 0.48615 |
| Hs.57697   | NM 001523 | HABP1       | Hyaluronan synthase 1                                                                                 | 0.00076 | 0.00054 | 0.00073 | 0.00066 | 0.55862      | 0.17411    | 0.09494     | 0.23020 |
| Hs.643447  | NM 000201 | ICAM1       | Intercellular adhesion molecule 1                                                                     | 0.00257 | 0.00375 | 0.00216 | 0.00258 | 0.05787      | 0.05834    | 0.02387     | 0.95983 |
| Hs.644352  | NM 181501 | ITGA1       | Integrin, alpha 1                                                                                     | 0.01138 | 0.01234 | 0.01007 | 0.01041 | 0.01052      | 0.31003    | 0.03617     | 0.02562 |
| Hs.482077  | NM 002203 | ITGA2       | Integrin, alpha 2 (CD49B, alpha 2 subunit of VLA-2 receptor)                                          | 0.01957 | 0.01566 | 0.02056 | 0.01962 | 0.51746      | 0.45796    | 0.1314      | 0.98520 |
| Hs.265829  | NM 002204 | ITGA3       | Integrin, alpha 3 (antigen CD49C, alpha 3 subunit of VLA-3 receptor)                                  | 0.07036 | 0.06857 | 0.07108 | 0.0722  | 0.78418      | 0.64021    | 0.55331     | 0.51259 |
| Hs.440955  | NM 000885 | ITGA4       | Integrin, alpha 4 (antigen CD49D, alpha 4 subunit of VLA-4 receptor)                                  | 0.01954 | 0.02028 | 0.01991 | 0.01992 | 0.35276      | 0.98364    | 0.42532     | 0.44221 |
| Hs.505654  | NM 002205 | ITGA5       | Integrin, alpha 5 (fibronectin receptor, alpha polypeptide)                                           | 0.145   | 0.13846 | 0.14829 | 0.14605 | 0.50035      | 0.65434    | 0.33584     | 0.87481 |
| Hs.133397  | NM 000210 | ITGA6       | Integrin, alpha 6                                                                                     | 0.00269 | 0.00232 | 0.00233 | 0.00222 | 0.07556      | 0.52507    | 0.13784     | 0.01388 |
| Hs.524484  | NM 002206 | ITGA7       | Integrin, alpha 7                                                                                     | 0.00233 | 0.00279 | 0.00194 | 0.0022  | 0.03879      | 0.02098    | 0.03025     | 0.35258 |
| Hs.592472  | NM 003638 | ITGA8       | Integrin, alpha 8                                                                                     | 0.00008 | 0.00011 | 0.00007 | 0.00007 | 0.40162      | 0.86957    | 0.01769     | 0.32000 |
| Hs.174103  | NM 002209 | ITGAL       | Integrin, alpha L (antigen CD11A (p180), lymphocyte function-associated antigen 1; alpha polypeptide) | 0.00015 | 0.0001  | 0.0001  | 0.00014 | 0.46052      | 0.32006    | 0.4532      | 0.86959 |
| Hs.172631  | NM 000632 | ITGAM       | Integrin, alpha M (complement component 3 receptor 3 subunit)                                         | 0.0001  | 0.00006 | 0.00007 | 0.0001  | 0.55125      | 0.36685    | 0.48051     | 0.97465 |
| Hs.436873  | NM 002210 | ITGAV       | Integrin, alpha V (vitronectin receptor, alpha polypeptide, antigen CD51)                             | 0.0267  | 0.02855 | 0.02649 | 0.02802 | 0.83754      | 0.04401    | 0.18146     | 0.08600 |
| Hs.643813  | NM 002211 | ITGB1       | Integrin, beta 1 (fibronectin receptor, beta polypeptide, antigen CD29 includes MDF2, MSK12)          | 0.72729 | 0.74048 | 0.66995 | 0.6759  | 0.08336      | 0.69081    | 0.71703     | 0.13636 |
| Hs.375957  | NM 000211 | ITGB2       | Integrin, beta 2 (complement component 3 receptor 3 and 4 subunit)                                    | 0.00006 | 0.00004 | 0.00004 | 0.00005 | 0.55021      | 0.12003    | 0.42093     | 0.92139 |
| Hs.218040  | NM 000212 | ITGB3       | Integrin, beta 3 (platelet glycoprotein IIIa, antigen CD61)                                           | 0.02209 | 0.02113 | 0.02707 | 0.02699 | 0.00025      | 0.94523    | 0.40158     | 0.00341 |
| Hs.632226  | NM 000213 | ITGB4       | Integrin, beta 4                                                                                      | 0.00006 | 0.00006 | 0.00005 | 0.00008 | 0.30051      | 0.03231    | 0.81586     | 0.15111 |
| Hs.13155   | NM 000213 | ITGB5       | Integrin, beta 5                                                                                      | 0.02983 | 0.02992 | 0.03512 | 0.03501 | 0.0003       | 0.94761    | 0.92348     | 0.01805 |
| Hs.521869  | NM 000216 | ANOS1       | Kallmann syndrome 1 sequence                                                                          | ND      | ND      | ND      | ND      |              |            |             |         |
| Hs.270364  | NM 00559  | LAMA1       | Laminin, alpha 1                                                                                      | 0.00033 | 0.00028 | 0.00033 | 0.00033 | 0.69876      | 0.81132    | 0.03498     | 0.61152 |
| Hs.200841  | NM 000426 | LAMA2       | Laminin, alpha 2                                                                                      | 0.0039  | 0.00396 | 0.00329 | 0.00336 | 0.01609      | 0.70177    | 0.77818     | 0.06479 |
| Hs.436367  | NM 000227 | LAMA3       | Laminin, alpha 3                                                                                      | 0.00054 | 0.00064 | 0.00047 | 0.00056 | 0.0672       | 0.02058    | 0.13928     | 0.57211 |
| Hs.650585  | NM 002291 | LAMB1       | Laminin, beta 1                                                                                       | 0.07931 | 0.07877 | 0.07418 | 0.07609 | 0.11452      | 0.43647    | 0.84369     | 0.22305 |
| Hs.497636  | NM 000228 | LAMB3       | Laminin, beta 3                                                                                       | 0.00194 | 0.00135 | 0.00151 | 0.00193 | 0.55121      | 0.29777    | 0.37667     | 0.99914 |
| Hs.609663  | NM 002293 | LAMC1       | Laminin, gamma 1 (formerly LAMB2)                                                                     | 0.32225 | 0.35221 | 0.3187  | 0.33205 | 0.81908      | 0.21105    | 0.07161     | 0.44430 |
| Hs.83169   | NM 002421 | MMP1        | Matrix metalloproteinase 1 (interstitial collagenase)                                                 | 0.03259 | 0.02268 | 0.05469 | 0.04833 | 0.00019      | 0.33644    | 0.09047     | 0.00669 |
| Hs.2258    | NM 002425 | MMP10       | Matrix metalloproteinase 10 (stromelysin 2)                                                           | 0.00022 | 0.00013 | 0.00017 | 0.00025 | 0.59229      | 0.15854    | 0.29905     | 0.78325 |
| Hs.143751  | NM 005940 | MMP11       | Matrix metalloproteinase 11 (stromelysin 3)                                                           | 0.00027 | 0.0003  | 0.00035 | 0.0004  | 0.00203      | 0.02451    | 0.34651     | 0.00600 |
| Hs.1695    | NM 002426 | MMP12       | Matrix metalloproteinase 12 (macrophage elastase)                                                     | 0.13324 | 0.12743 | 0.17424 | 0.11334 | 0.47741      | 0.4413     | 0.92643     | 0.79896 |
| Hs.2936    | NM 002427 | MMP13       | Matrix metalloproteinase 13 (collagenase 3)                                                           | ND      | ND      | ND      | ND      |              |            |             |         |
| Hs.2399    | NM 004995 | MMP14       | Matrix metalloproteinase 14 (membrane-inserted)                                                       | 0.03739 | 0.0358  | 0.04359 | 0.04318 | 0.01557      | 0.91822    | 0.54826     | 0.20905 |
| Hs.80343   | NM 002428 | MMP15       | Matrix metalloproteinase 15 (membrane-inserted)                                                       | 0.00066 | 0.00041 | 0.00043 | 0.00052 | 0.50457      | 0.39176    | 0.44233     | 0.70155 |
| Hs.546267  | NM 005941 | MMP16       | Matrix metalloproteinase 16 (membrane-inserted)                                                       | 0.00462 | 0.00449 | 0.00453 | 0.0046  | 0.67195      | 0.75484    | 0.6654      | 0.94856 |
| Hs.513617  | NM 004530 | MMP2        | Matrix metalloproteinase 2 (gelatinase A, 72kDa gelatinase, 72kDa type IV collagenase)                | 0.22974 | 0.24959 | 0.24212 | 0.28262 | 0.18306      | 0.03988    | 0.03908     | 0.00139 |
| Hs.375129  | NM 002422 | MMP3        | Matrix metalloproteinase 3 (stromelysin 1, progelatinase)                                             | 0.12583 | 0.10869 | 0.14593 | 0.1462  | 0.05395      | 0.98262    | 0.29475     | 0.17245 |
| Hs.2256    | NM 002423 | MMP7        | Matrix metalloproteinase 7 (matrilysin, uterin)                                                       | 0.00002 | 0.00002 | 0.00001 | 0.00002 | 0.09885      | 0.06493    | 0.30591     | 0.42679 |
| Hs.161839  | NM 002424 | MMP8        | Matrix metalloproteinase 8 (neutrophil collagenase)                                                   | 0.00021 | 0.00011 | 0.00013 | 0.0002  | 0.50544      | 0.37106    | 0.3601      | 0.95458 |
| Hs.297413  | NM 004994 | MMP9        | Matrix metalloproteinase 9 (gelatinase B, 92kDa gelatinase, 92kDa type IV collagenase)                | 0.00003 | 0.00003 | 0.00002 | 0.00002 | 0.02406      | 0.33779    | 0.886       | 0.01839 |
| Hs.503878  | NM 000615 | NCAM1       | Neural cell adhesion molecule 1                                                                       | 0.00033 | 0.00032 | 0.00021 | 0.00027 | 0.0002       | 0.0167     | 0.81849     | 0.04084 |
| Hs.514412  | NM 000442 | PECAM1      | Platelet/endothelial cell adhesion molecule                                                           | 0.00032 | 0.00028 | 0.00026 | 0.00031 | 0.46827      | 0.47505    | 0.52615     | 0.95456 |
| Hs.82848   | NM 000450 | SELE        | Selectin E                                                                                            | 0.00004 | 0.00002 | 0.00002 | 0.00004 | 0.442        | 0.34419    | 0.40617     | 0.90930 |
| Hs.728756  | NM 000655 | SELL        | Selectin L                                                                                            | 0.00009 | 0.00006 | 0.00006 | 0.00008 | 0.53616      | 0.30632    | 0.53785     | 0.89059 |
| Hs.73800   | NM 003005 | SELP        | Selectin P (granule membrane protein 140kDa, antigen CD62)                                            | ND      | ND      | ND      | ND      |              |            |             |         |
| Hs.371199  | NM 003919 | SGCE        | Sarcoglycan, epsilon                                                                                  | 0.01397 | 0.01495 | 0.01279 | 0.01338 | 0.10283      | 0.30583    | 0.17254     | 0.55885 |
| Hs.111779  | NM 003118 | SPARC       | Secreted protein, acidic, cysteine-rich (osteonectin)                                                 | 0.46351 | 0.53538 | 0.4746  | 0.52523 | 0.5002       | 0.02883    | 0.00093     | 0.02906 |
| Hs.185597  | NM 003119 | SPG7        | Spatio paraplegin 7 (pure and complicated autosomal recessive)                                        | 0.0092  | 0.00886 | 0.0083  | 0.00847 | 0.04015      | 0.49169    | 0.25828     | 0.09882 |
| Hs.313     | NM 000582 | SPP1        | Secreted phosphoprotein 1                                                                             | 0.00035 | 0.00038 | 0.00042 | 0.0005  | 0.08643      | 0.02592    | 0.49471     | 0.00192 |
| Hs.369397  | NM 000358 | TGFB1       | Transforming growth factor, beta-induced, 68kDa                                                       | 0.60628 | 0.72007 | 0.64928 | 0.68922 | 0.17741      | 0.12869    | 0.00937     | 0.00444 |
| Hs.732539  | NM 003246 | THBS1       | Thrombospondin 1                                                                                      | 0.11698 | 0.13673 | 0.15024 | 0.15937 | 0            |            |             |         |
